# Supplementary material for: Simulating cold-region hydrology in an intensively drained agricultural watershed in Manitoba, Canada, using the Cold Regions Hydrological Model
Source: Copernicus journal article supplement (doi:10.5194/hess-21-3483-2017), 2017-07-12

This file magnifies the individual panels comprising Figure 6 in the manuscript “Simulating cold-region hydrology in an intensively drained agricultural watershed in Manitoba, Canada, using the Cold Regions Hydrological Model”. The original figure is provided on this page for reference and the individual panels are shown in the next pages following the annual sequence.

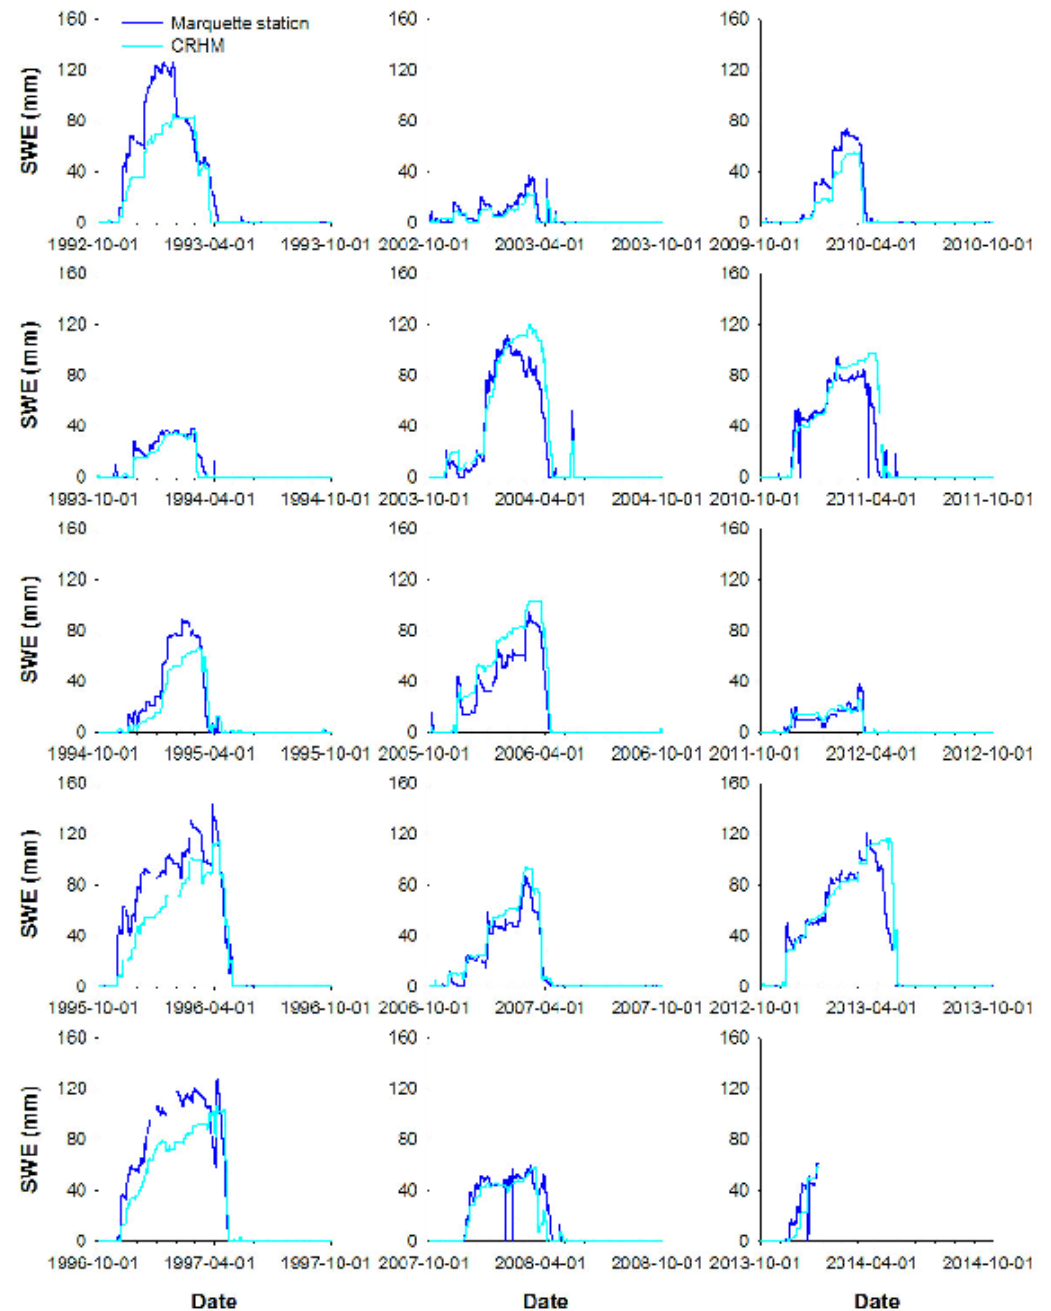

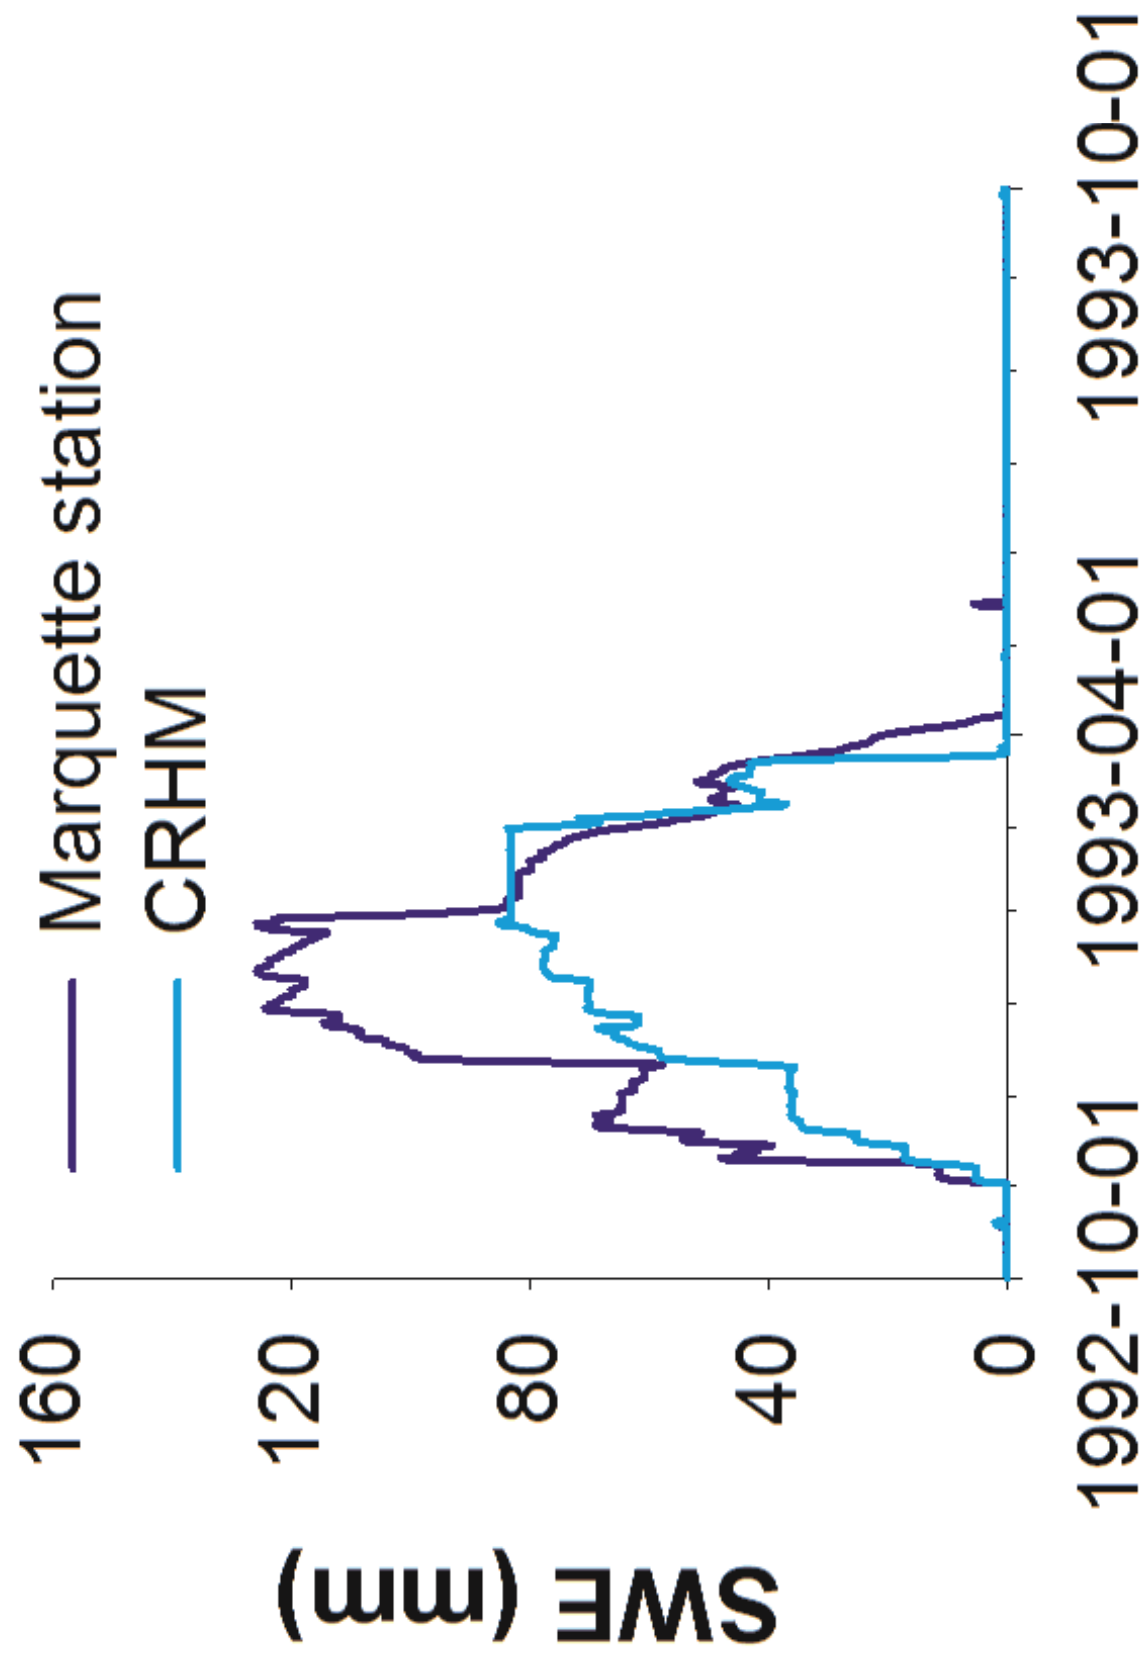

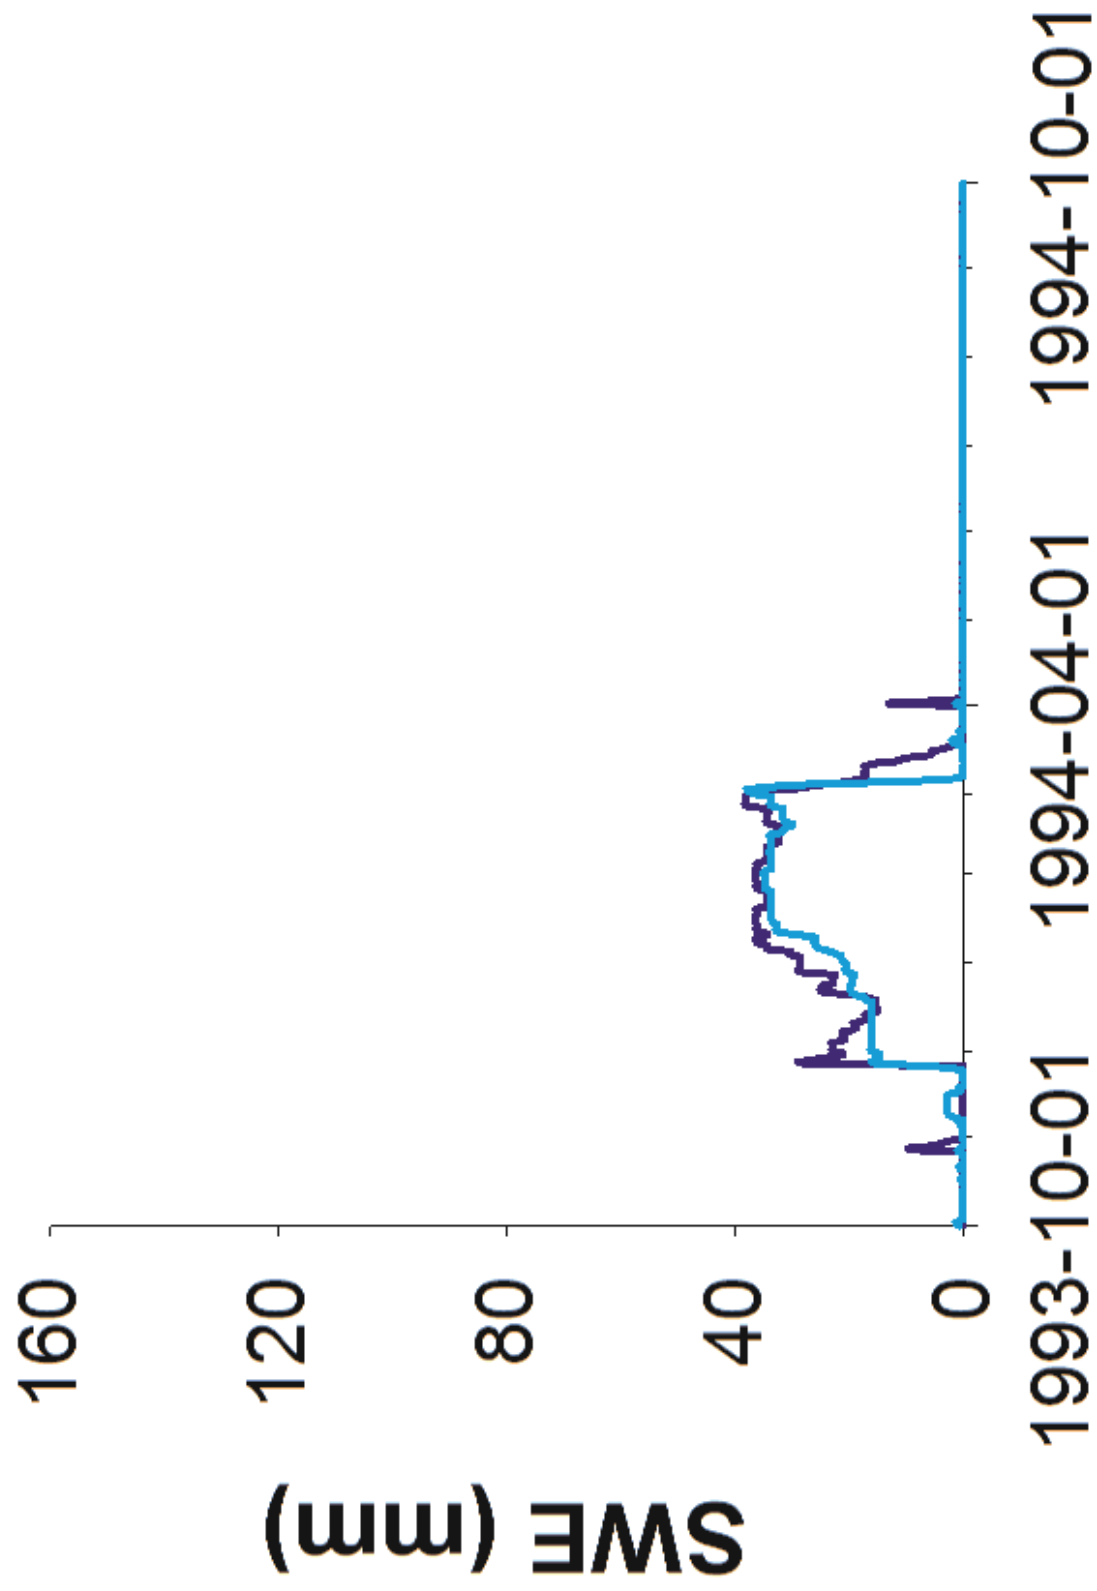

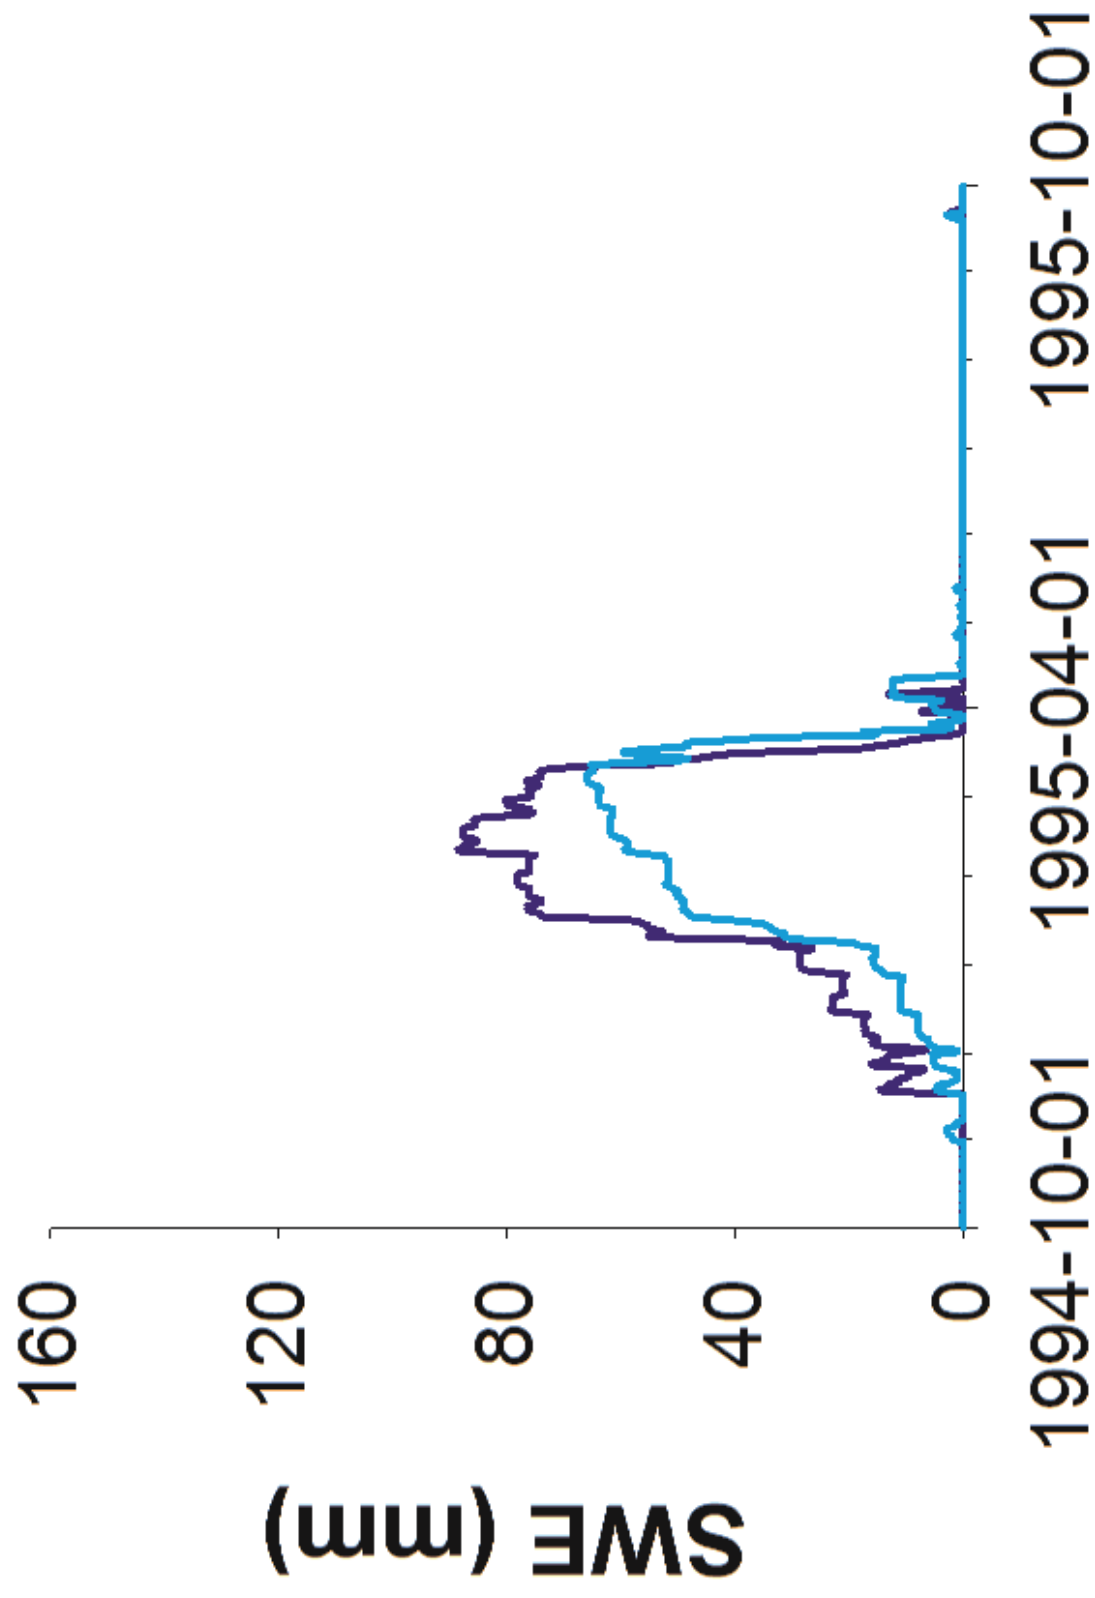

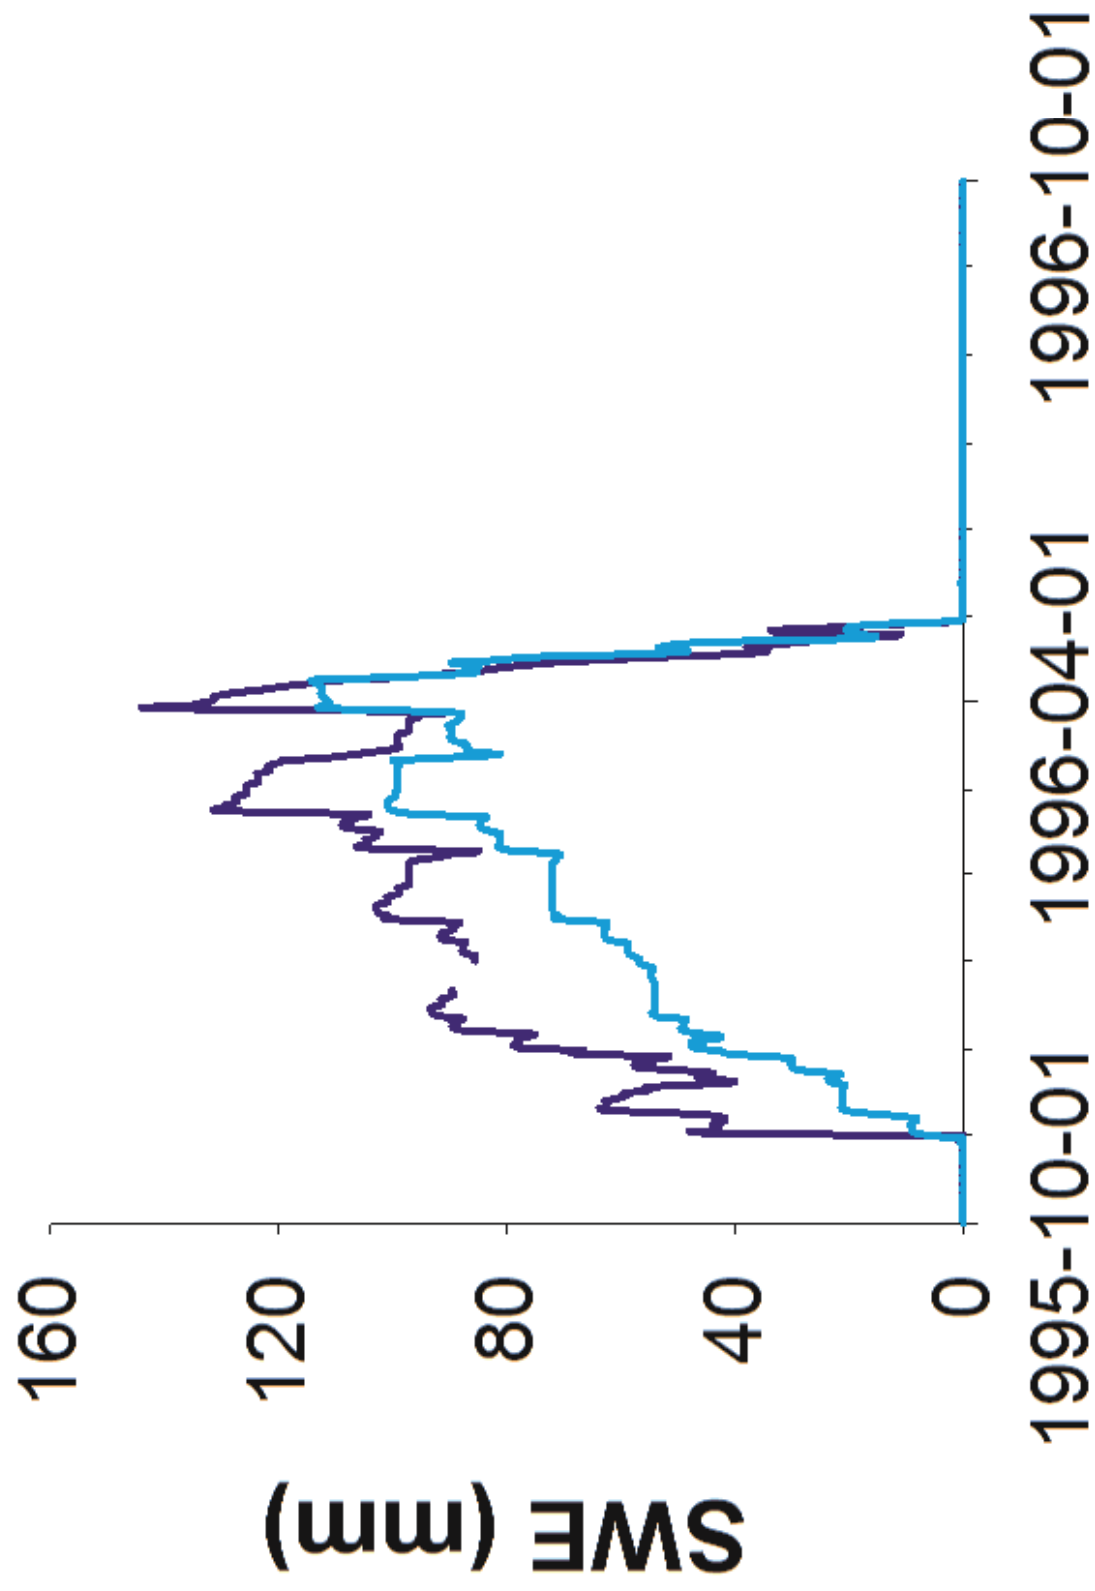

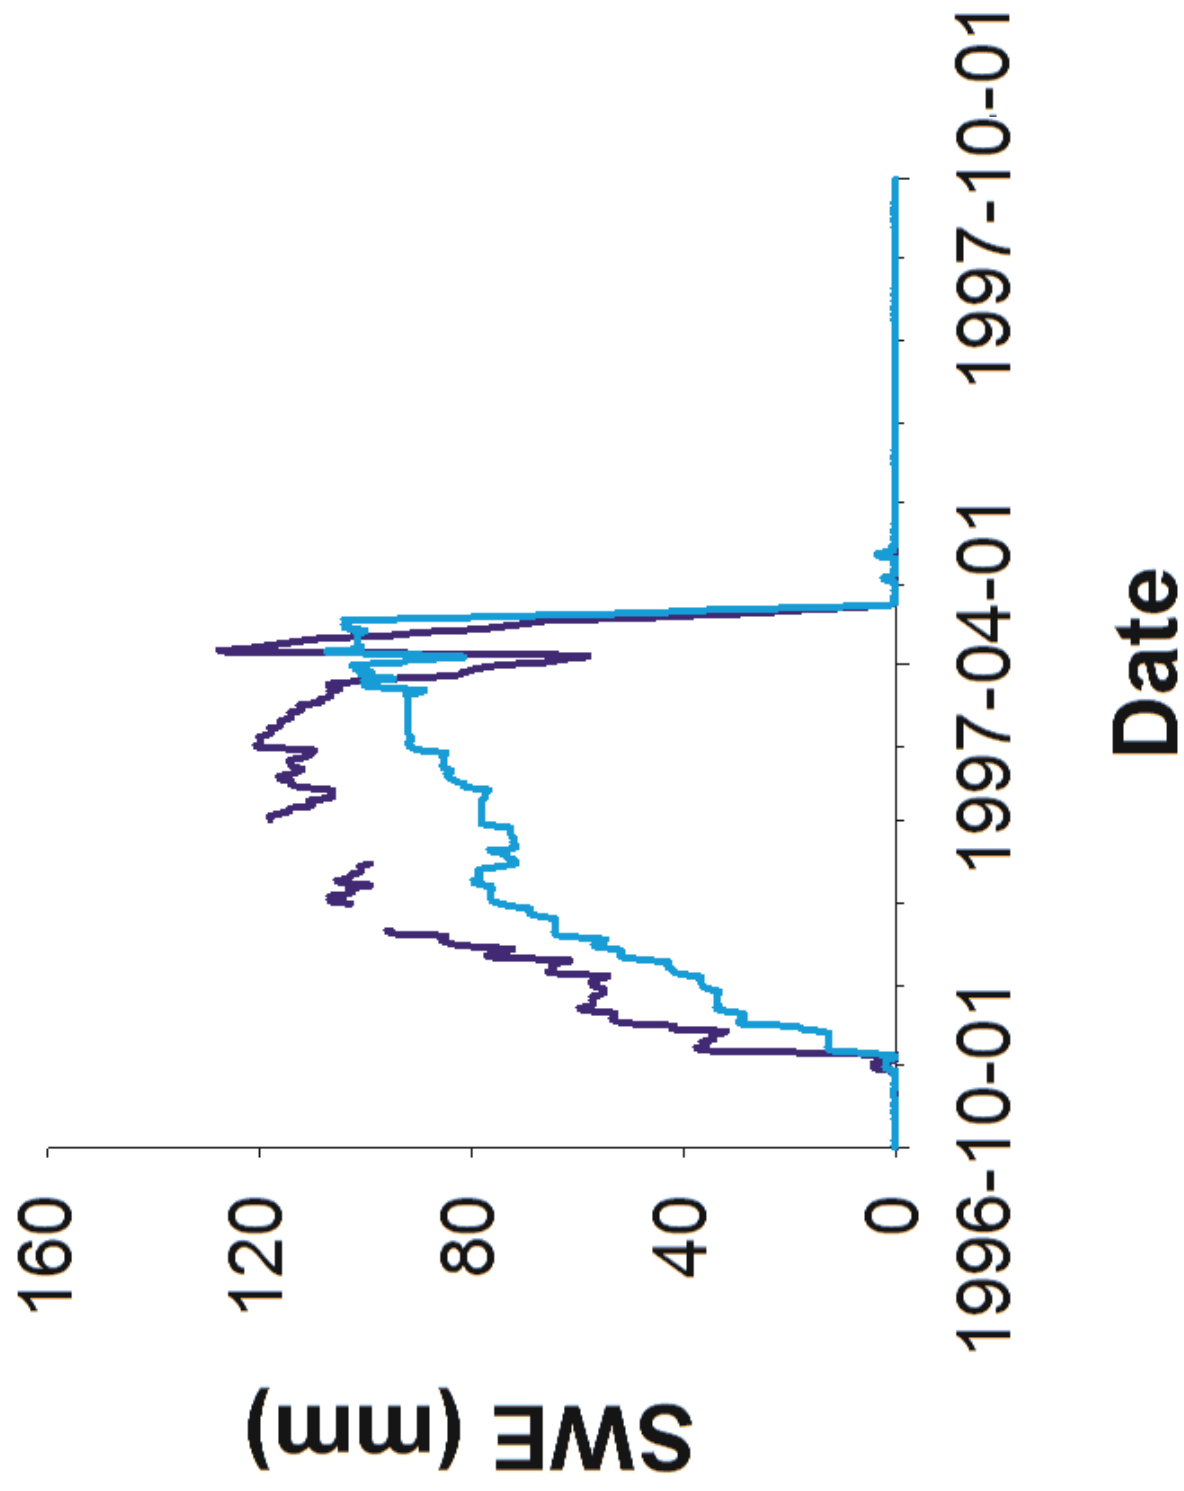

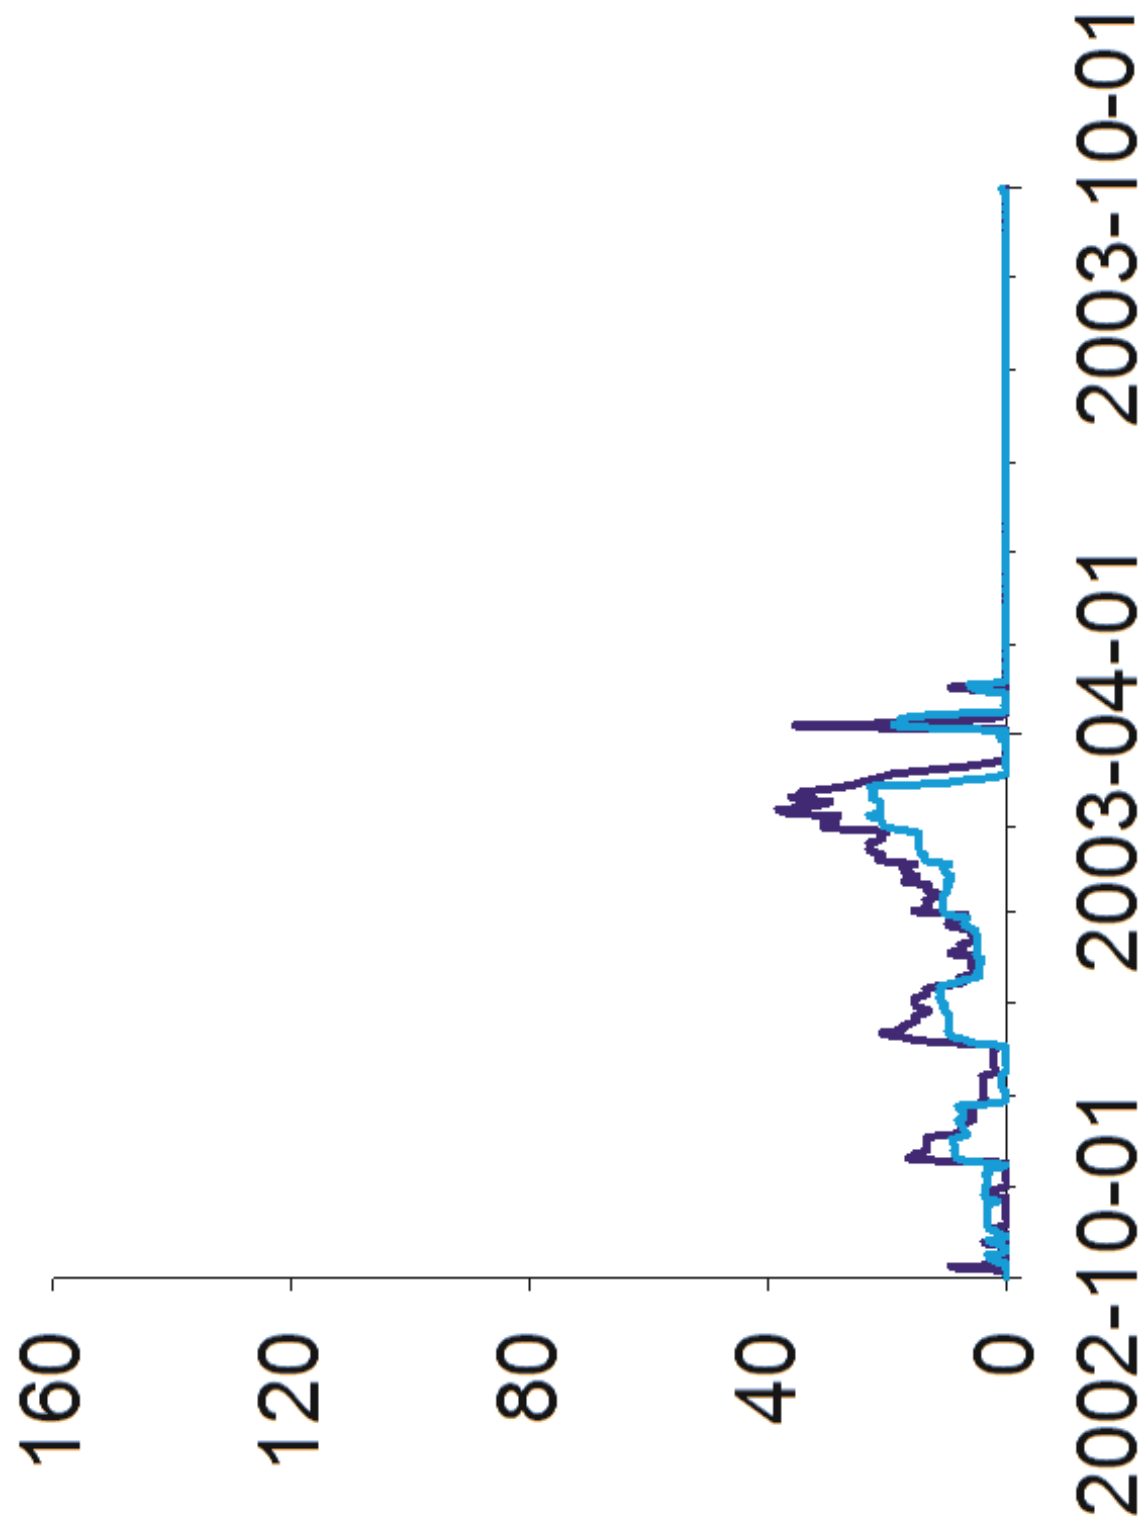

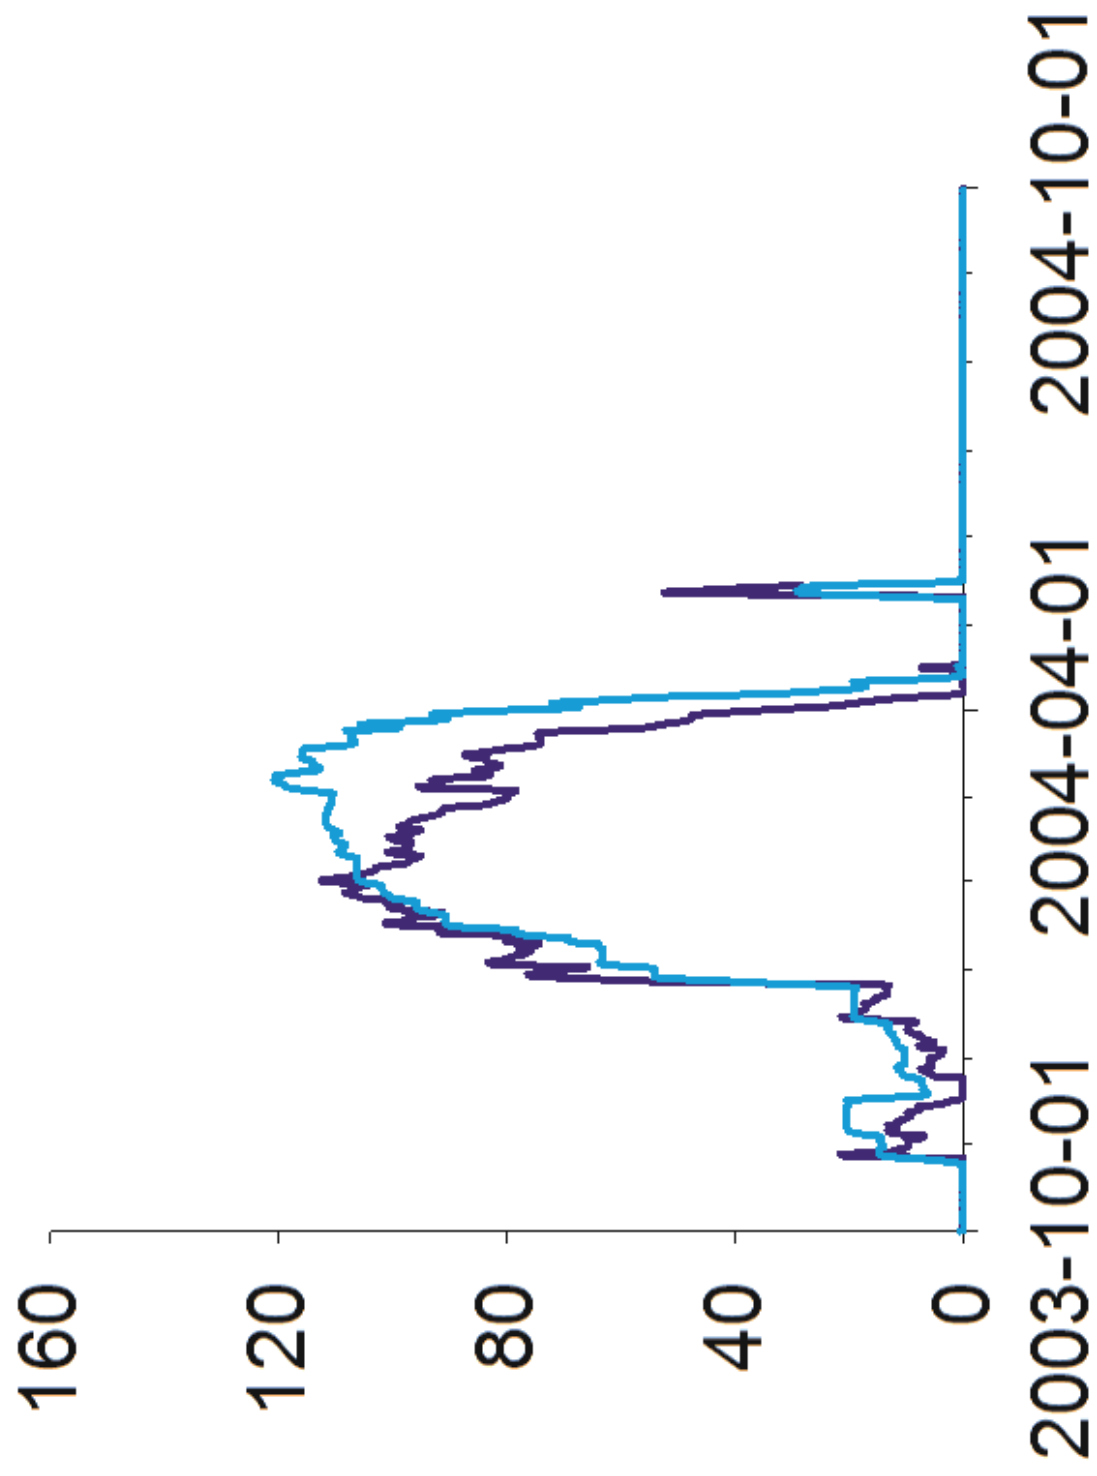



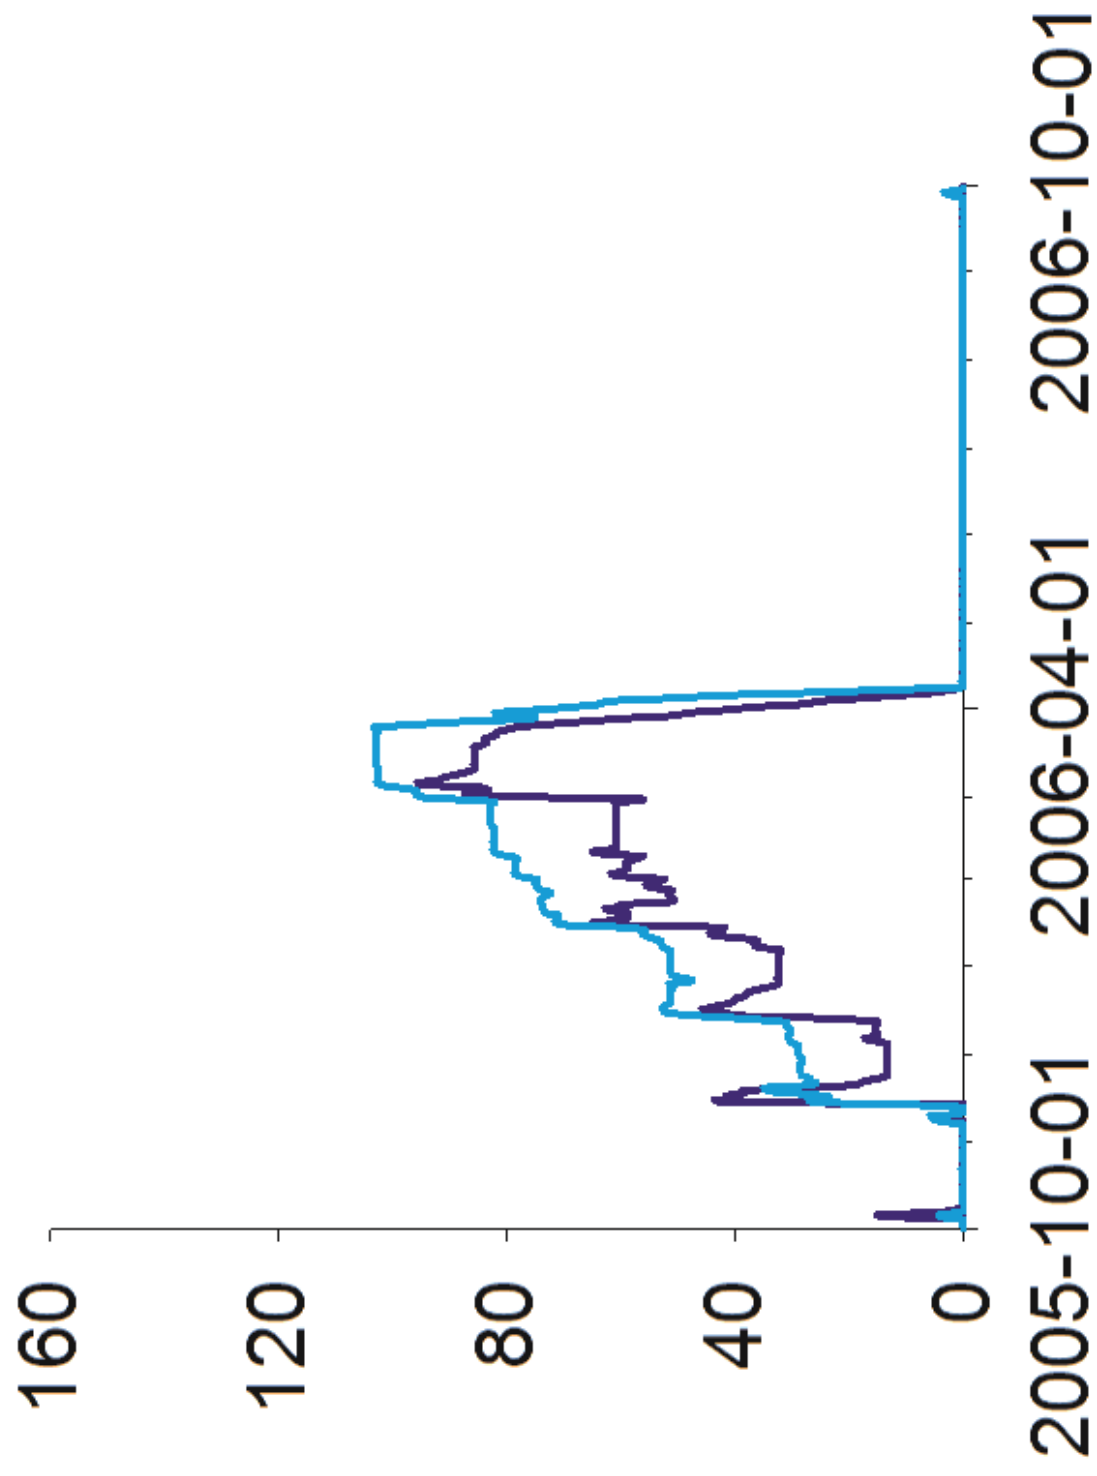

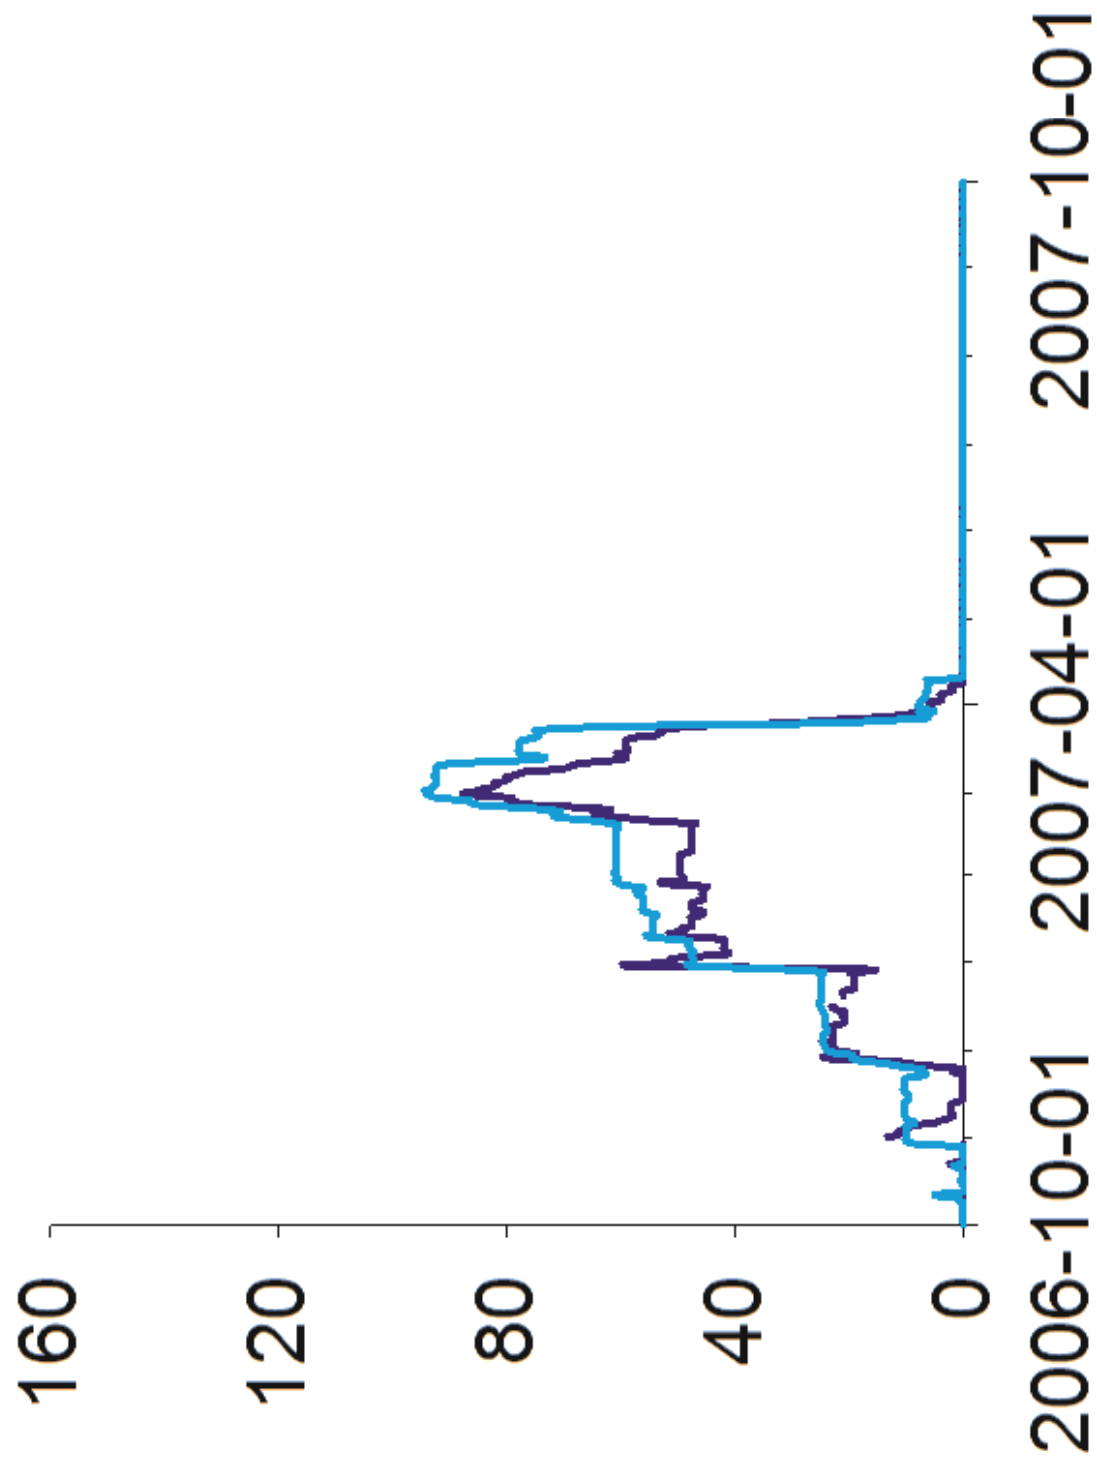

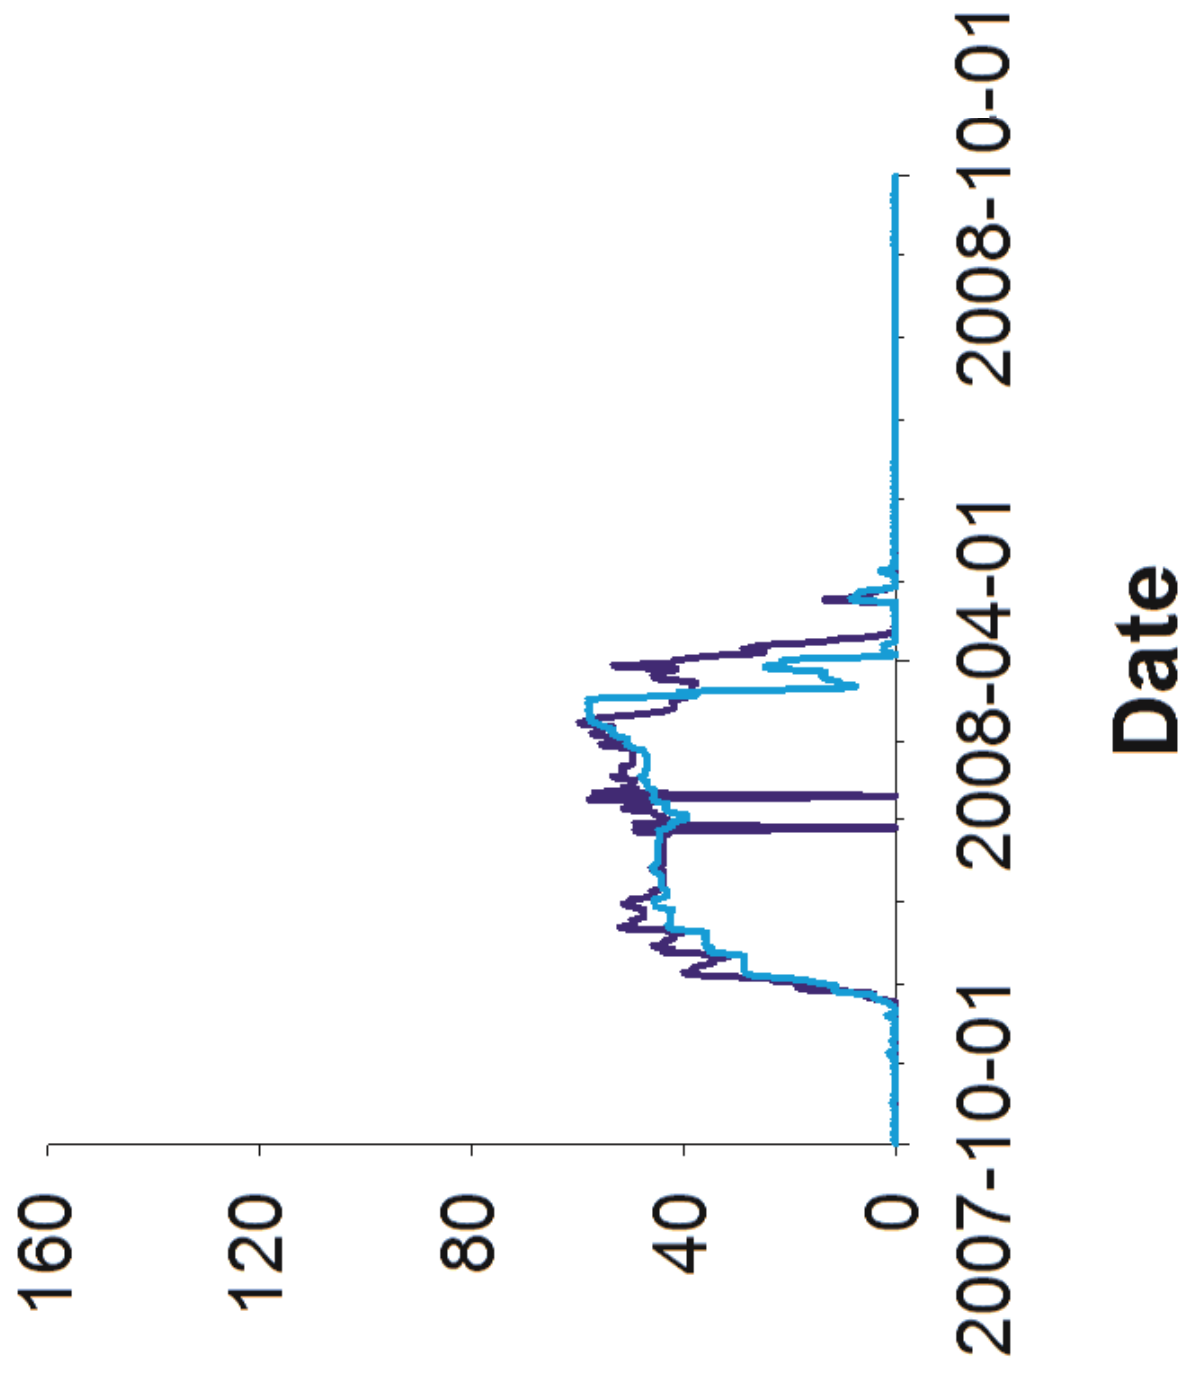

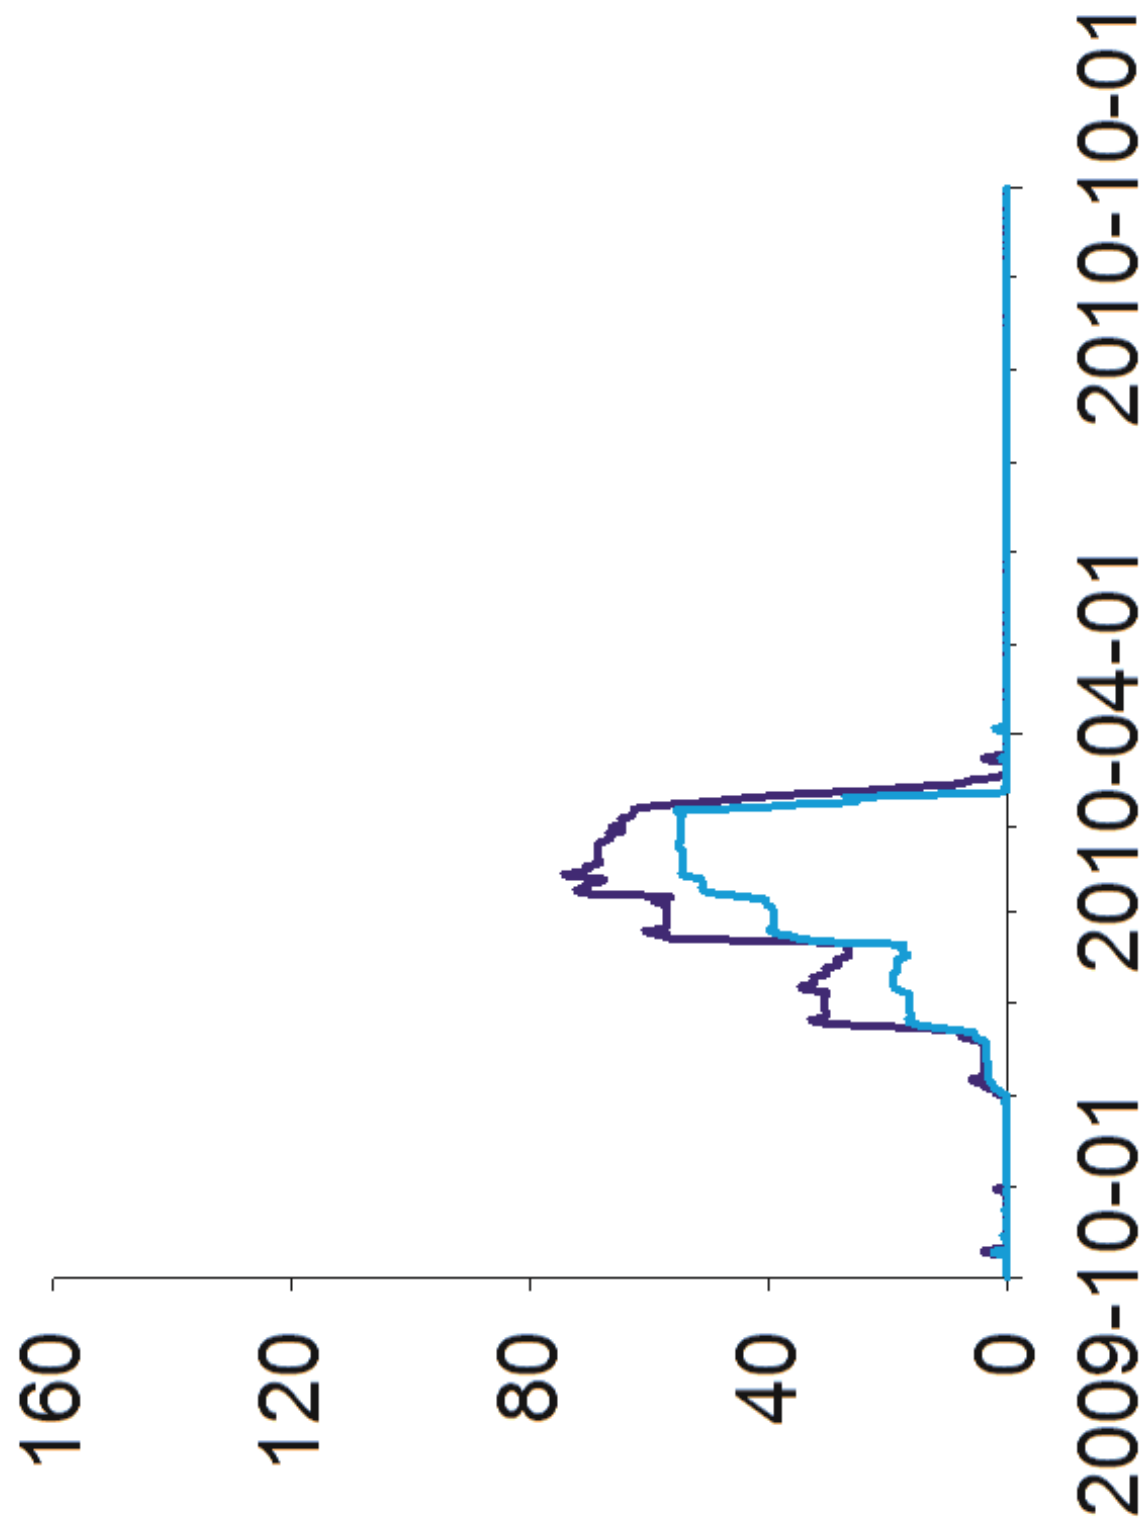

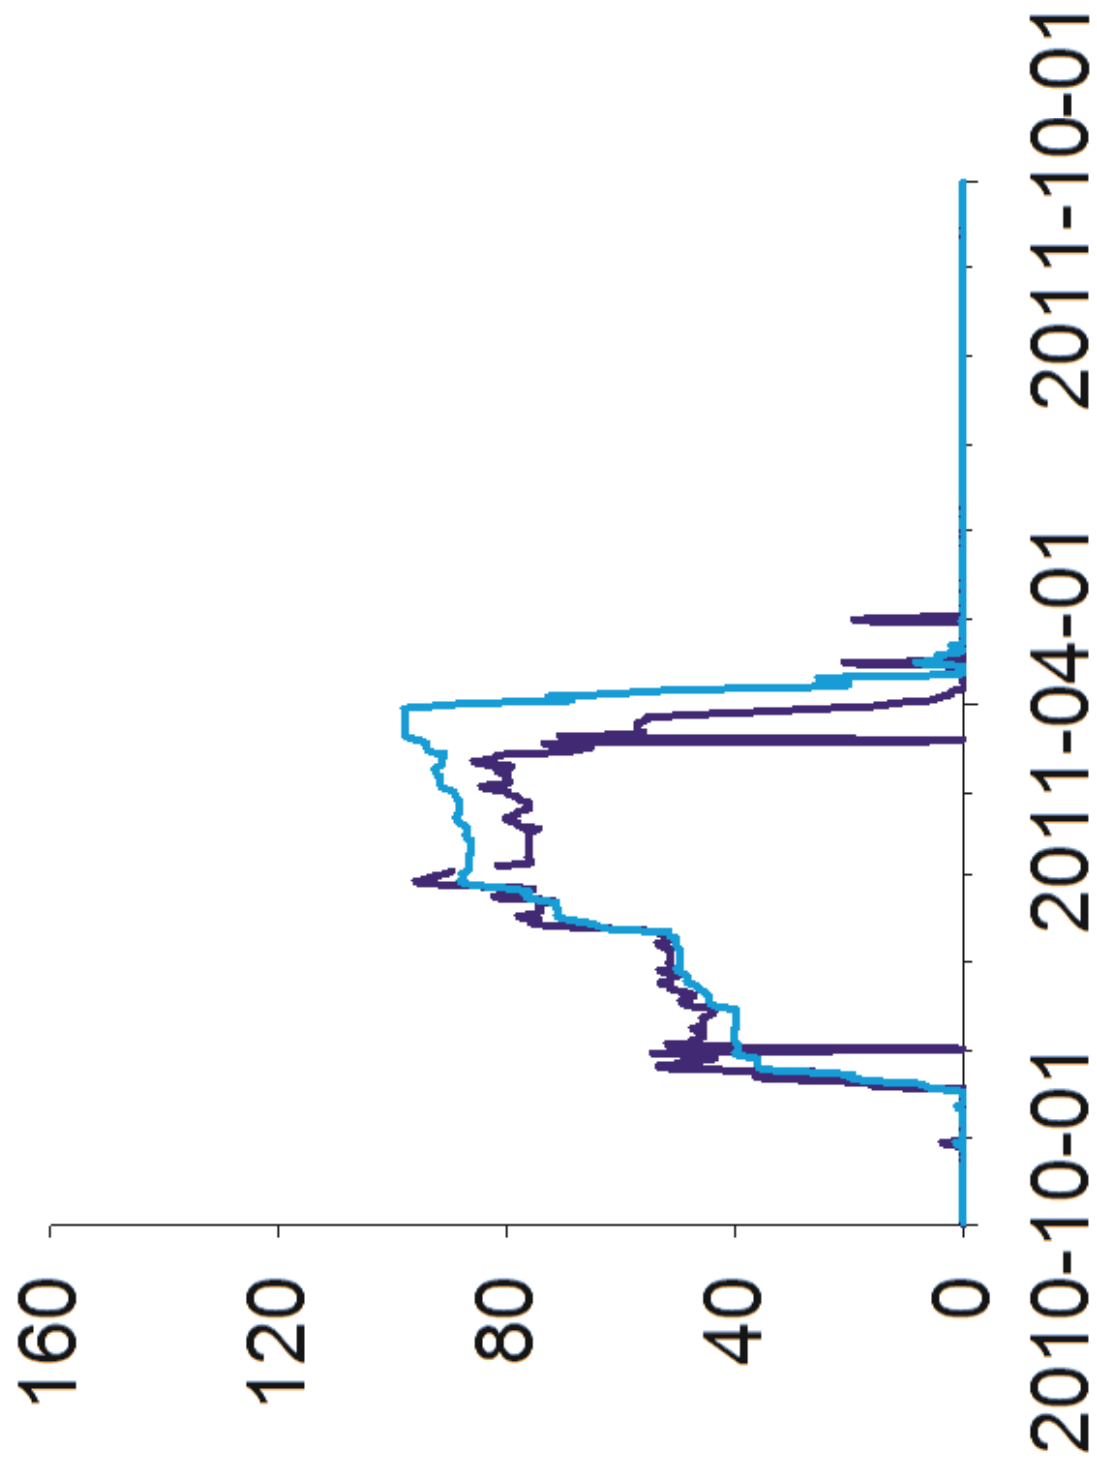

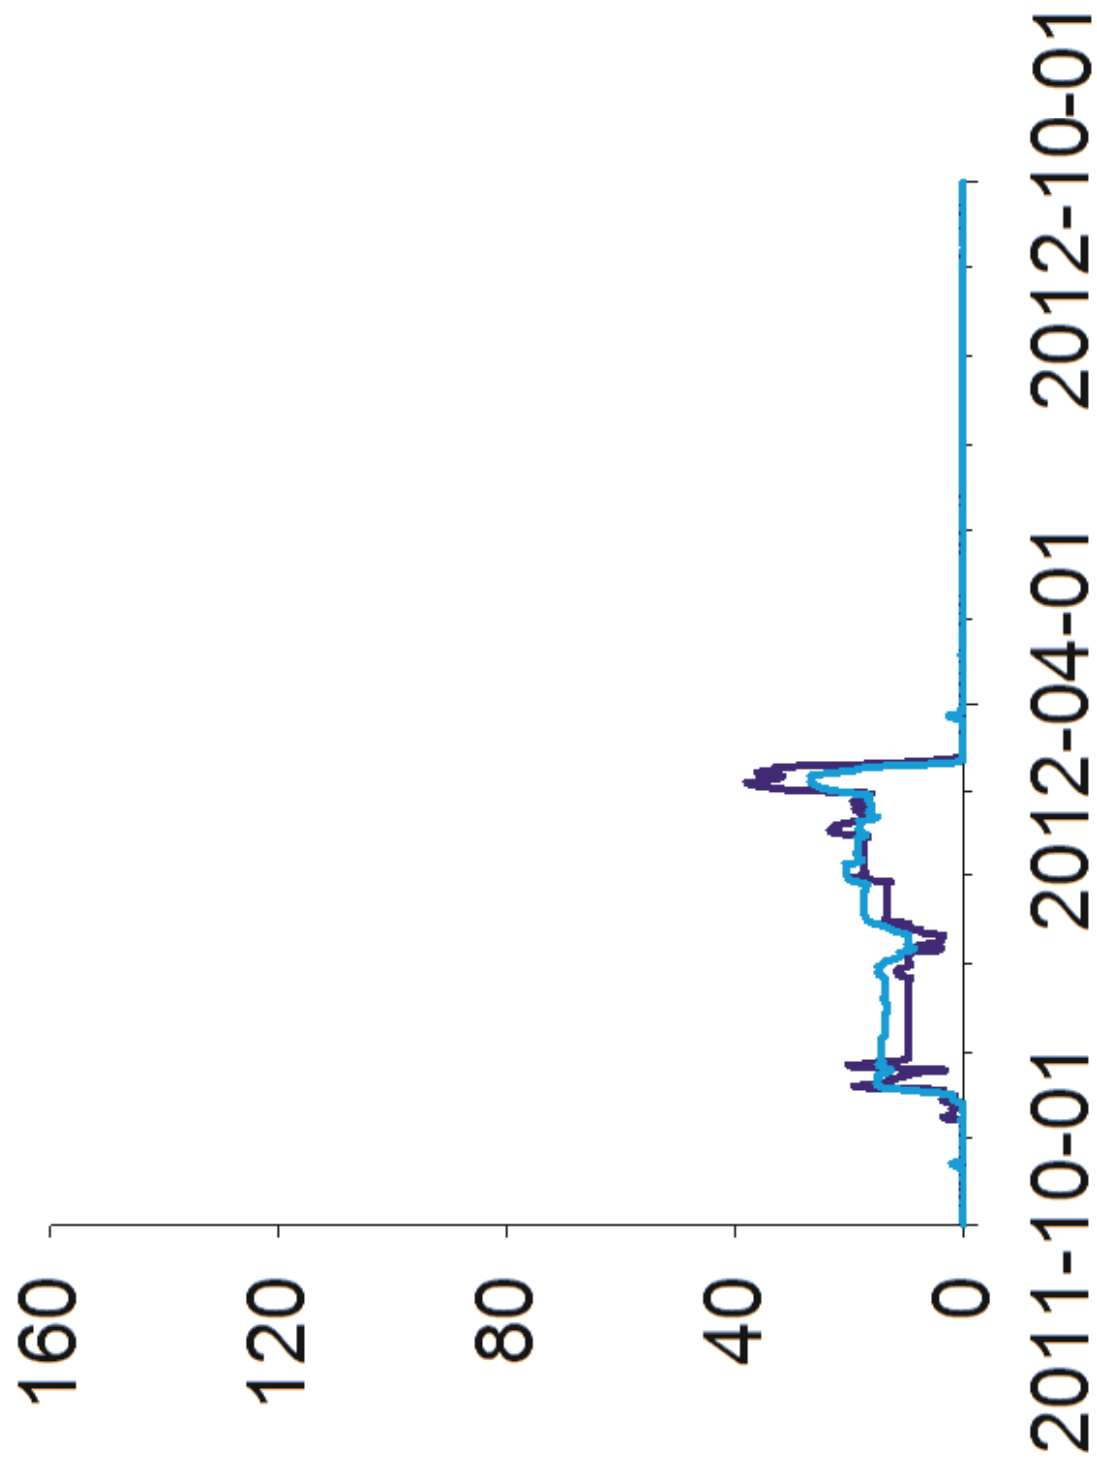

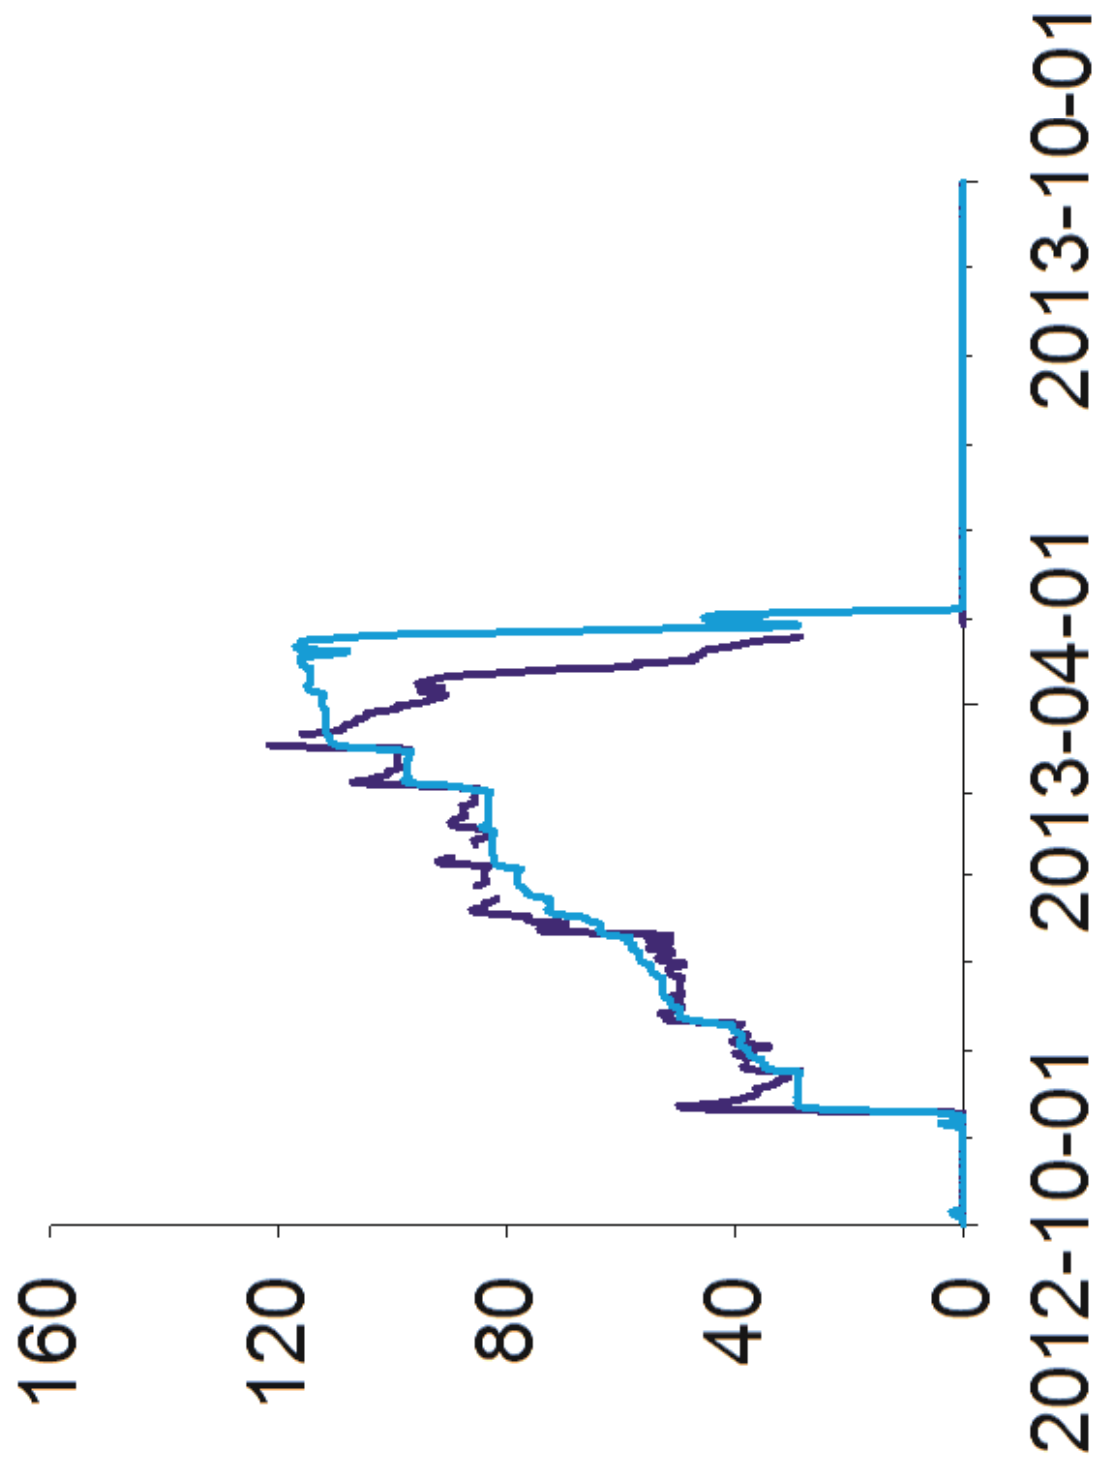

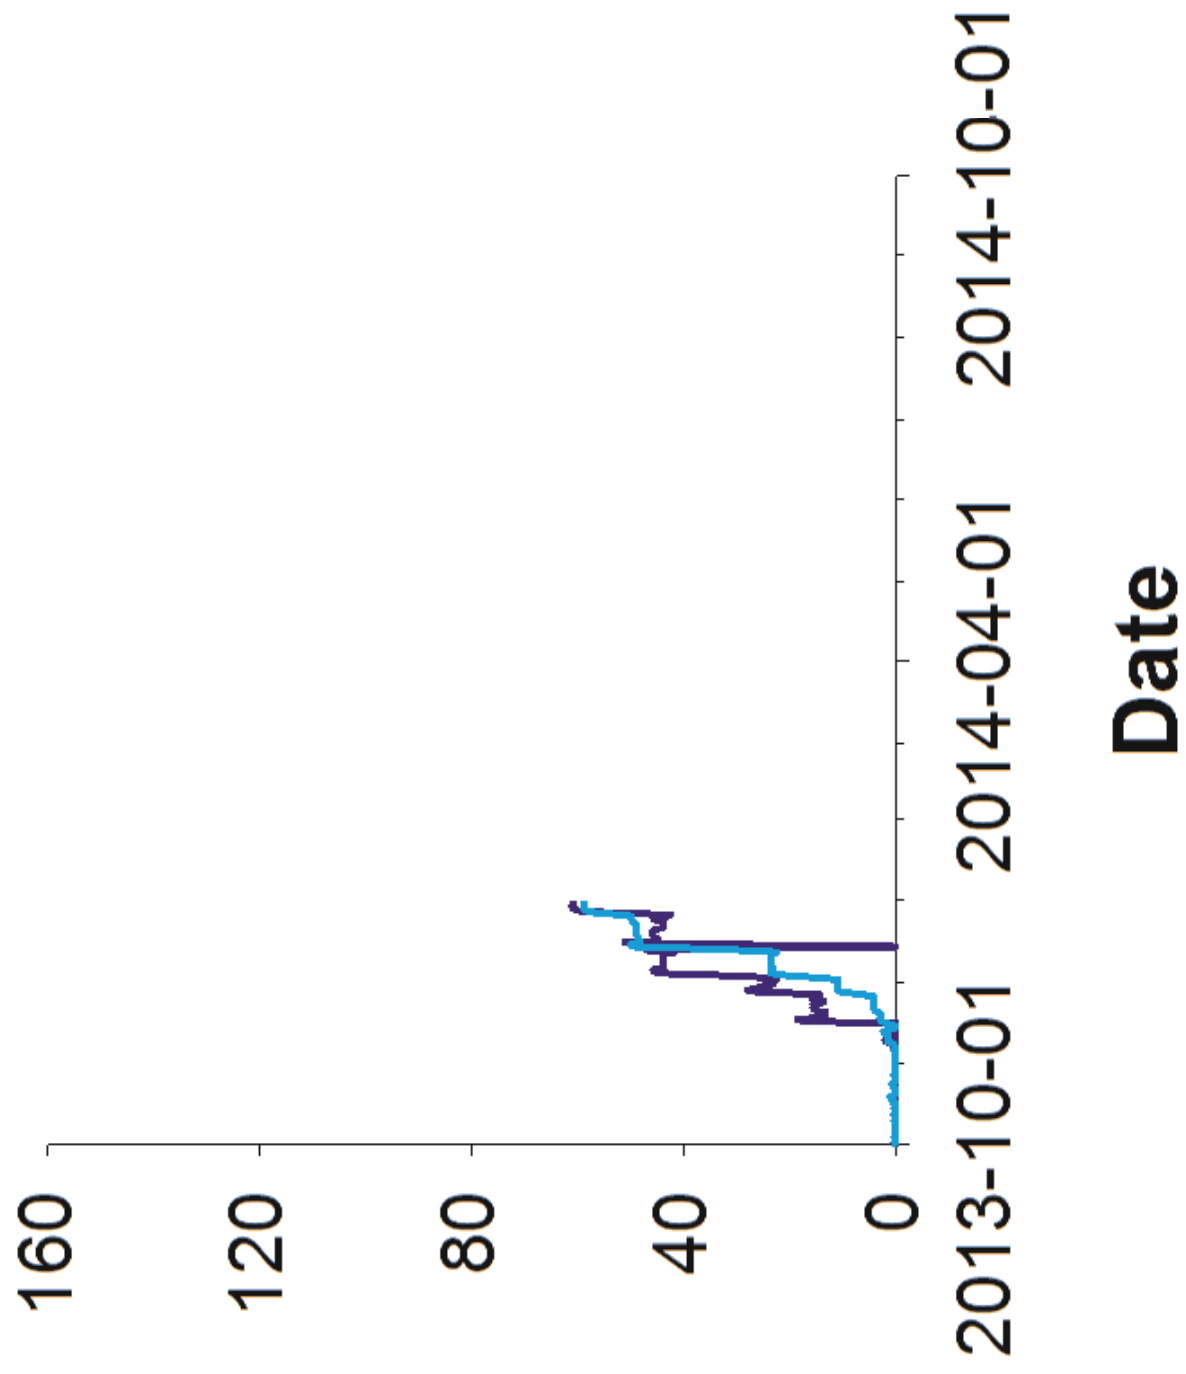

Supplement: Supplementary file 5 [file hess-21-3483-2017-supplement.zip]
