# Supplementary material for: Simulating cold-region hydrology in an intensively drained agricultural watershed in Manitoba, Canada, using the Cold Regions Hydrological Model
Source: Copernicus journal article supplement (doi:10.5194/hess-21-3483-2017), 2017-07-12
Supplement: Supplementary file 1 [file hess-21-3483-2017-supplement.zip]

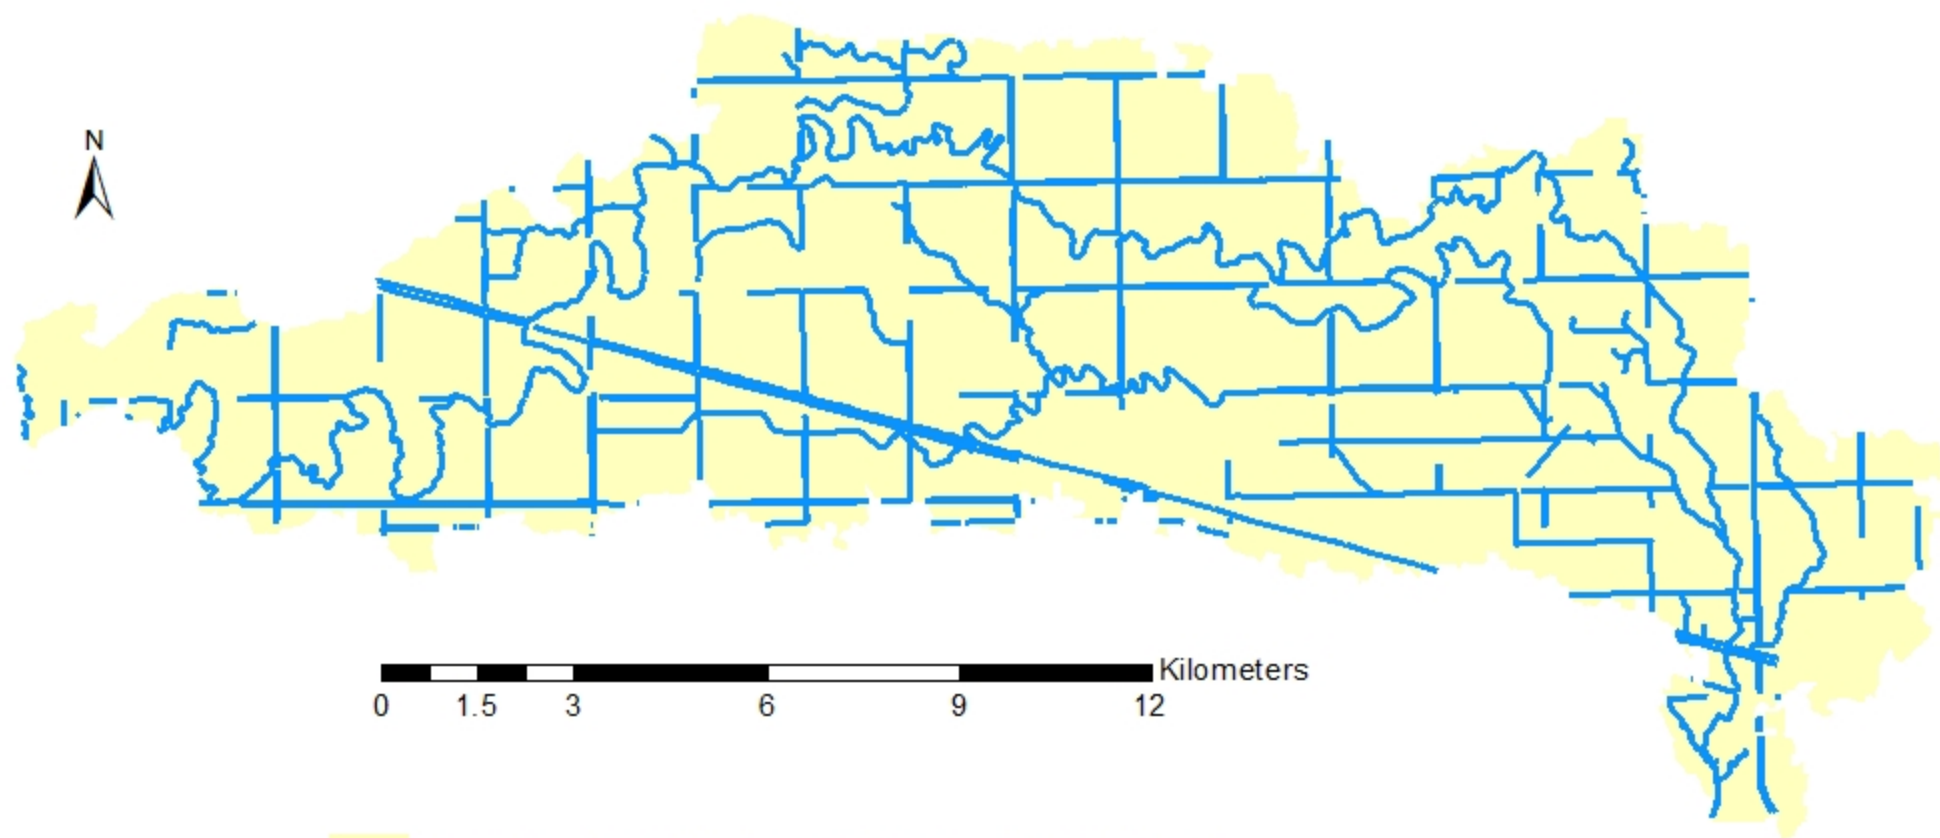

0 1.5 3 6 9 12 Kilometers

- Study area (Sub-catchment of the La Salle River Watershed)
- Drainage network (River channel + surface ditches)
