# Supplementary material for: Simulating cold-region hydrology in an intensively drained agricultural watershed in Manitoba, Canada, using the Cold Regions Hydrological Model
Source: Copernicus journal article supplement (doi:10.5194/hess-21-3483-2017), 2017-07-12
Supplement: Supplementary file 10 [file hess-21-3483-2017-supplement.zip]

Archive with 9 entries (9 files):
- Cordeiro2017_Supplement01_Land_use-split_method.pdf
- Cordeiro2017_Supplement07_Figure6_partsCOMB.pdf
- Cordeiro2017_Supplement05_Figure3_partsCOMB.pdf
- hess-21-3483-2017-supplement-title-page.pdf
- Cordeiro2017_Supplement02_DrainageNetwork.pdf
- Cordeiro2017_Supplement08_Figure8_partsCOMB.pdf
- Cordeiro2017_Supplement03_ProcessChart.pdf
- Cordeiro2017_Supplement06_Figure5_partsCOMB.pdf
- Cordeiro2017_Supplement04_ModuleStructure.pdf
