# Supplementary figures and images for: Simulating cold-region hydrology in an intensively drained agricultural watershed in Manitoba, Canada, using the Cold Regions Hydrological Model
Source: Copernicus journal article supplement (doi:10.5194/hess-21-3483-2017), 2017-07-12

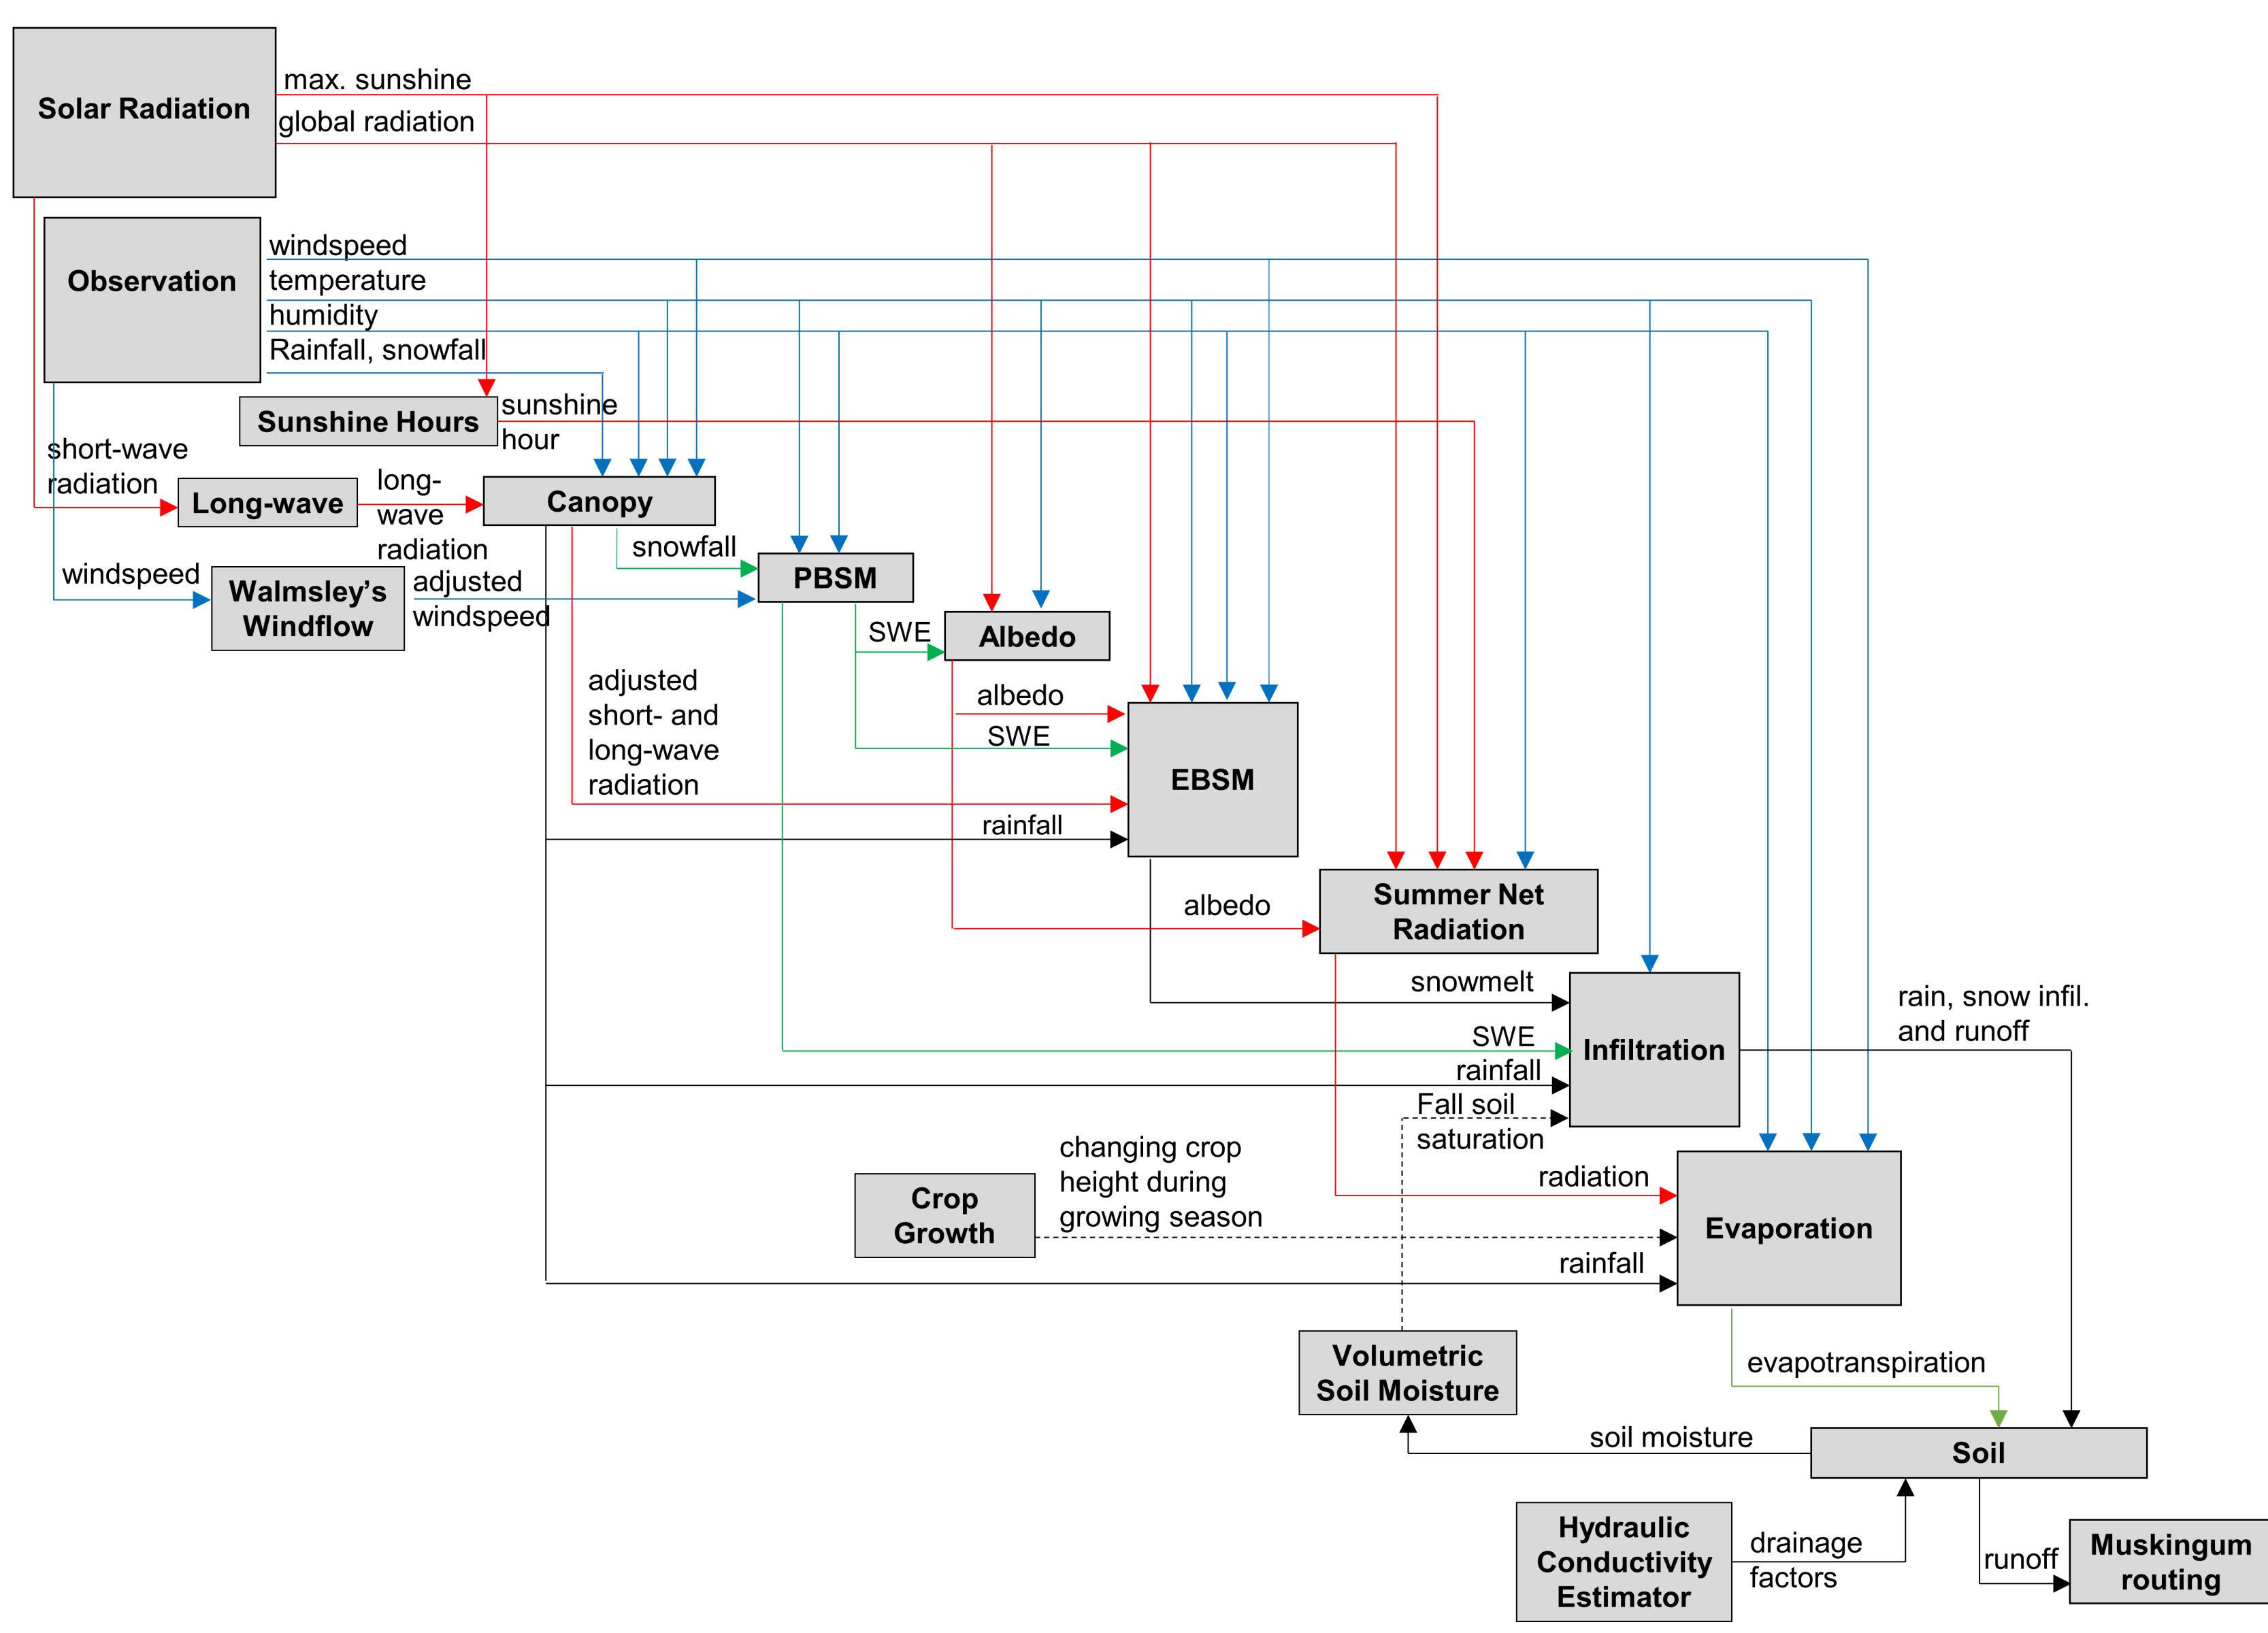

Supplement: Supplementary file 2 [file hess-21-3483-2017-supplement.zip]

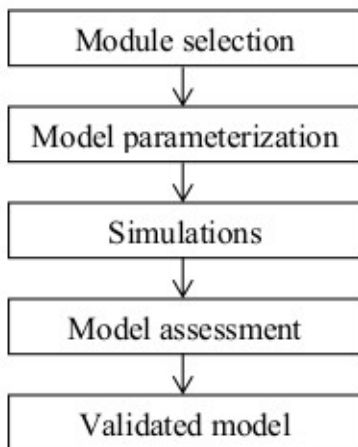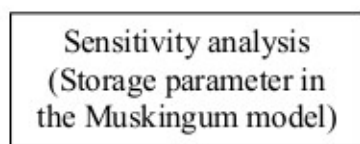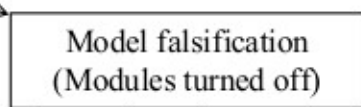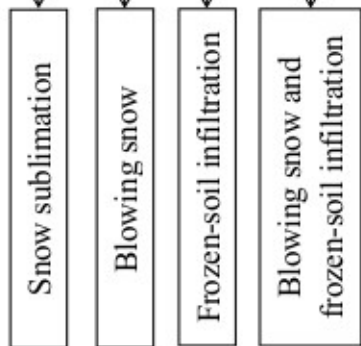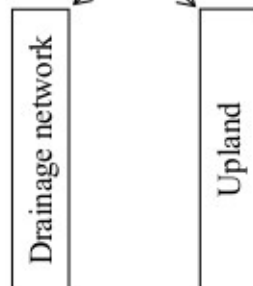

Supplement: Supplementary file 8 [file hess-21-3483-2017-supplement.zip]
